1    Convergent evolution and structural adaptation to the deep ocean  
2                                    in the eukaryotic chaperonin CCT $\alpha$

3  
4    Alexandra A.-T. Weber<sup>1,2,3\*</sup>, Andrew F. Hugall<sup>1</sup>, Timothy D. O'Hara<sup>1</sup>

5    <sup>1</sup>Sciences, Museums Victoria, GPO Box 666, Melbourne VIC 3001, Australia

6    <sup>2</sup>Centre de Bretagne, REM/EEP, Ifremer, Laboratoire Environnement Profond, 29280 Plouzané,  
7    France

8    <sup>3</sup>Zoological Institute, University of Basel, Vesalgasse 1, 4051 Basel, Switzerland

9    Email            addresses:        [aweber@museum.vic.gov.au](mailto:aweber@museum.vic.gov.au);        [ahugall@museum.vic.gov.au](mailto:ahugall@museum.vic.gov.au);  
10    [tohara@museum.vic.gov.au](mailto:tohara@museum.vic.gov.au)

11    \*Corresponding author: Alexandra A.-T. Weber

12    ORCID ID:

13    A.A.-T. Weber: <https://orcid.org/0000-0002-7980-388X>

14    T.D. O'Hara: <https://orcid.org/0000-0003-0885-6578>

15

16

17    **Abstract**

18    The deep ocean is the largest biome on Earth and yet it is among the least studied environments  
19    of our planet. Life at great depths requires several specific adaptations, however their molecular  
20    mechanisms remain understudied. We examined patterns of positive selection in 416 genes  
21    from four ophiuroid families (216 species) displaying independent events of deep-sea  
22    colonization. We found consistent signatures of molecular convergence in 5 genes, including the  
23    CCT $\alpha$  gene (Chaperonin Containing TCP-1 subunit  $\alpha$ ), which is essential for protein folding.  
24    CCT $\alpha$  protein stability profiles across the ophiuroid tree of life (725 species) revealed that  
25    depth-adapted proteins display higher stability within and next to the substrate-binding region,  
26    an expectation for high-pressure adapted proteins. As CCT has previously been categorized as a  
27    'cold-shock' protein, we propose that adaptation mechanisms to cold and deep-sea  
28    environments may be linked and highlight that efficient protein folding is a key metabolic deep-  
29    sea adaptation.

30 The deep ocean (>200m) covers approximately two-thirds of the global sea floor area, yet it is  
31 among the least studied environments of our planet in terms of biodiversity, habitats and  
32 ecosystem functioning<sup>1</sup>. It harbors specific environmental conditions such as high pressure, low  
33 temperatures (0-4°C), absence of light and scarcity of food. Life at great depths requires  
34 multiple metabolic adaptations resulting in a physiological bottleneck<sup>2</sup>, limiting the vertical  
35 distribution of species<sup>3,4</sup>. Enzymatic processes, protein folding, assembly of multi-subunit  
36 proteins and lipoprotein membranes are influenced by pressure and temperature at the cellular  
37 level<sup>4-7</sup>. Thus, as an adaptation to deep-sea environments, high-pressure adapted proteins (i.e.  
38 barophilic proteins) have been shown to be more stable (i.e. more resistant to denaturation)  
39 than their shallow-water counterparts<sup>2,4,8,9</sup>. However, this has been measured in only a handful  
40 of proteins and taxa<sup>10-17</sup>. Interestingly, patterns of protein adaptation to temperature show  
41 higher flexibility (i.e. decreased stability) with decreasing temperature<sup>18,19</sup>. As pressure and  
42 temperature strongly co-vary in the deep sea - temperature decreases as pressure increases - it  
43 therefore can be difficult to disentangle the respective combined or opposing effects of these  
44 factors on protein stability evolution.

45 Patterns of positive selection have been investigated to uncover genes underlying adaptation to  
46 specific environments, including the deep-sea, in non-model species<sup>20-25</sup>. Although valuable,  
47 these studies typically focused on a single or few shallow-deep transitions in a limited number  
48 of species, and thus lack the comparative power to separate confounding effects. With almost  
49 2100 species, brittle stars (Ophiuroidea) are a large and ancient class of echinoderms<sup>26,27</sup>. These  
50 diverse marine invertebrates have colonized every marine habitat, highlighting their strong  
51 adaptive abilities. Furthermore, their phylogeny is well-resolved<sup>28,29</sup> and they represent a major  
52 component of the deep-sea fauna, making them important models for marine biogeography<sup>30,31</sup>.  
53 It is usually assumed that deep-sea organisms colonized the deep-sea from shallow waters;  
54 however, colonization from deep to shallow waters has also been reported<sup>3,32</sup>. Four large  
55 independent ophiuroid families (Amphiuridae, Ophiodermatidae, Ophiomyxidae and  
56 Ophiotrichidae) have a common ancestor from shallow water with extant species occurring in  
57 the deep-sea<sup>32</sup>. Due to these repeated and independent colonization events, these four brittle  
58 star families provide an ideal framework to test for convergent molecular evolution to the deep  
59 sea.

## 60 **Results**

61 *Five genes involved in protein biogenesis are recurrently positively selected in deep-sea brittle*  
62 *stars*

63 We used 416 single-copy orthologs from 216 species (288 individuals) of four brittle star  
 64 families (Figure 1A) to examine patterns of positive selection in deep-sea species (>200m). For  
 65 each gene of each family, we used four different positive selection methods and one method  
 66 detecting relaxation of selection (Figure 1B-C). To minimize false positive detection, we only  
 67 kept candidate genes that had significant signature of positive selection in at least three  
 68 methods and which also did not show relaxation of selection. We found 36 candidate genes in  
 69 Amphiuroidae, 9 in Ophiidermatidae, 6 in Ophiomyxidae and none in Ophiotrichidae (Table S2;  
 70 Figure S1). Five genes were positively selected in at least two families, among which one (CCT $\alpha$ )  
 71 was selected in all three families and significant in each one of the selection detection methods  
 72 (Table 1). To confirm that positive selection was detected only in shallow-deep transition, we  
 73 performed positive selection analyses on the five common candidate genes but this time  
 74 labelling shallow-water lineages as 'Foreground'. Most of the genes did not display signatures of  
 75 positive selection in shallow-water environments, except PFD3 in Amphiuroidae and tkt in  
 76 Ophiotrichidae, which were significant in the BUSTED, aBSREL and MEME methods (Table S3).  
 77 This suggests that these two genes are evolving faster not only in response to deep-sea  
 78 adaptation but also in response to different environmental conditions.

79 **Table 1:** common positively selected candidate genes in three families and their characteristics (3 of 4  
 80 methods, not displaying relaxation of selection). \*Positively selected in 4 of 4 methods, not displaying  
 81 relaxation of selection. Bold: common Biological Process annotation.

| Gene name      | Description                                         | Blast Reference sequence | GO terms: Biological Process                                                      | Positively selected in                     |
|----------------|-----------------------------------------------------|--------------------------|-----------------------------------------------------------------------------------|--------------------------------------------|
| CCT $\alpha$ * | chaperonin containing TCP1 complex subunit $\alpha$ | XP_780270.1              | <b>protein folding</b>                                                            | Amphiuridae, Ophiidermatidae, Ophiomyxidae |
| PFD3           | prefoldin subunit 3                                 | XP_797937.1              | macromolecular complex assembly; protein complex assembly; <b>protein folding</b> | Amphiuridae, Ophiidermatidae               |
| tkt*           | transketolase isoform X2                            | NP_1229589.1             | biological process                                                                | Amphiuridae, Ophiidermatidae               |
| rpl34          | subunit ribosomal                                   | XP_797232.1              | ribosome biogenesis; <b>translation</b>                                           | Amphiuridae, Ophiomyxidae                  |
| rpl8           | 60S ribosomal L8                                    | XP_796001.1              | <b>Translation</b>                                                                | Amphiuridae, Ophiomyxidae                  |

82

83

A. Phylogeny of Ophiuroidea

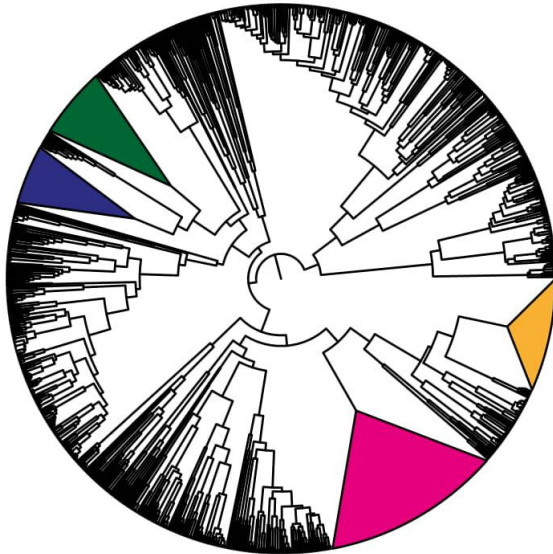

B. 416 single-copy orthologs: ML reconstruction

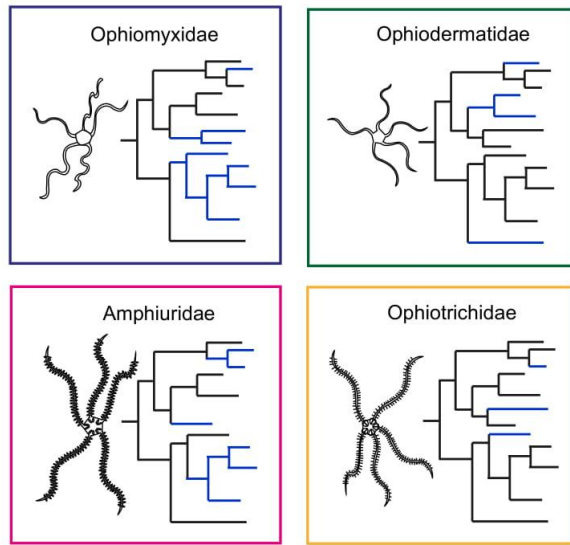

C. Candidate gene detection and analyses

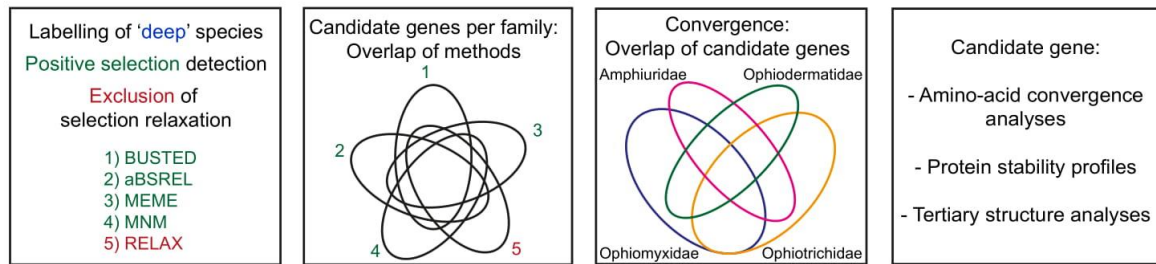

84

85 **Figure 1: Workflow used in this study.** A: Schematic representation of the phylogeny of Ophiuroidea  
86 (redrawn from<sup>27</sup>). Four families (288 individuals from 216 species) with a shallow-water common  
87 ancestor and extant species in shallow (0-200m) and deep (>200m) environments are highlighted in  
88 different colors. The width of each triangle is proportional to the number of species in each family.  
89 Ophiomyxidae (blue), Ophiodermatidae (green), Amphiuroidae (pink) and Ophiotrichidae (yellow). B: For  
90 each family and each one of the 416 single-copy orthologs, Maximum Likelihood (ML) reconstructions  
91 were performed. C: For each resulting ML tree, deep (>200m) species were labeled as foreground  
92 branches (colored blue) and four positive selection detection methods were used (BUSTED, aBSREL,  
93 MEME, MNM). To detect and exclude candidate genes displaying relaxation of selection, i.e. accumulation  
94 of substitutions not due to increased selection pressure, the method RELAX was used. The final set of  
95 candidate genes for each family encompassed genes positively selected in at least 3 methods and not  
96 displaying relaxation of selection. Convergent evolution was examined by overlapping candidate genes  
97 per family. For the most interesting candidate gene, amino-acid convergence analyses, protein stability  
98 profiles and tertiary structure analyses were performed.

89

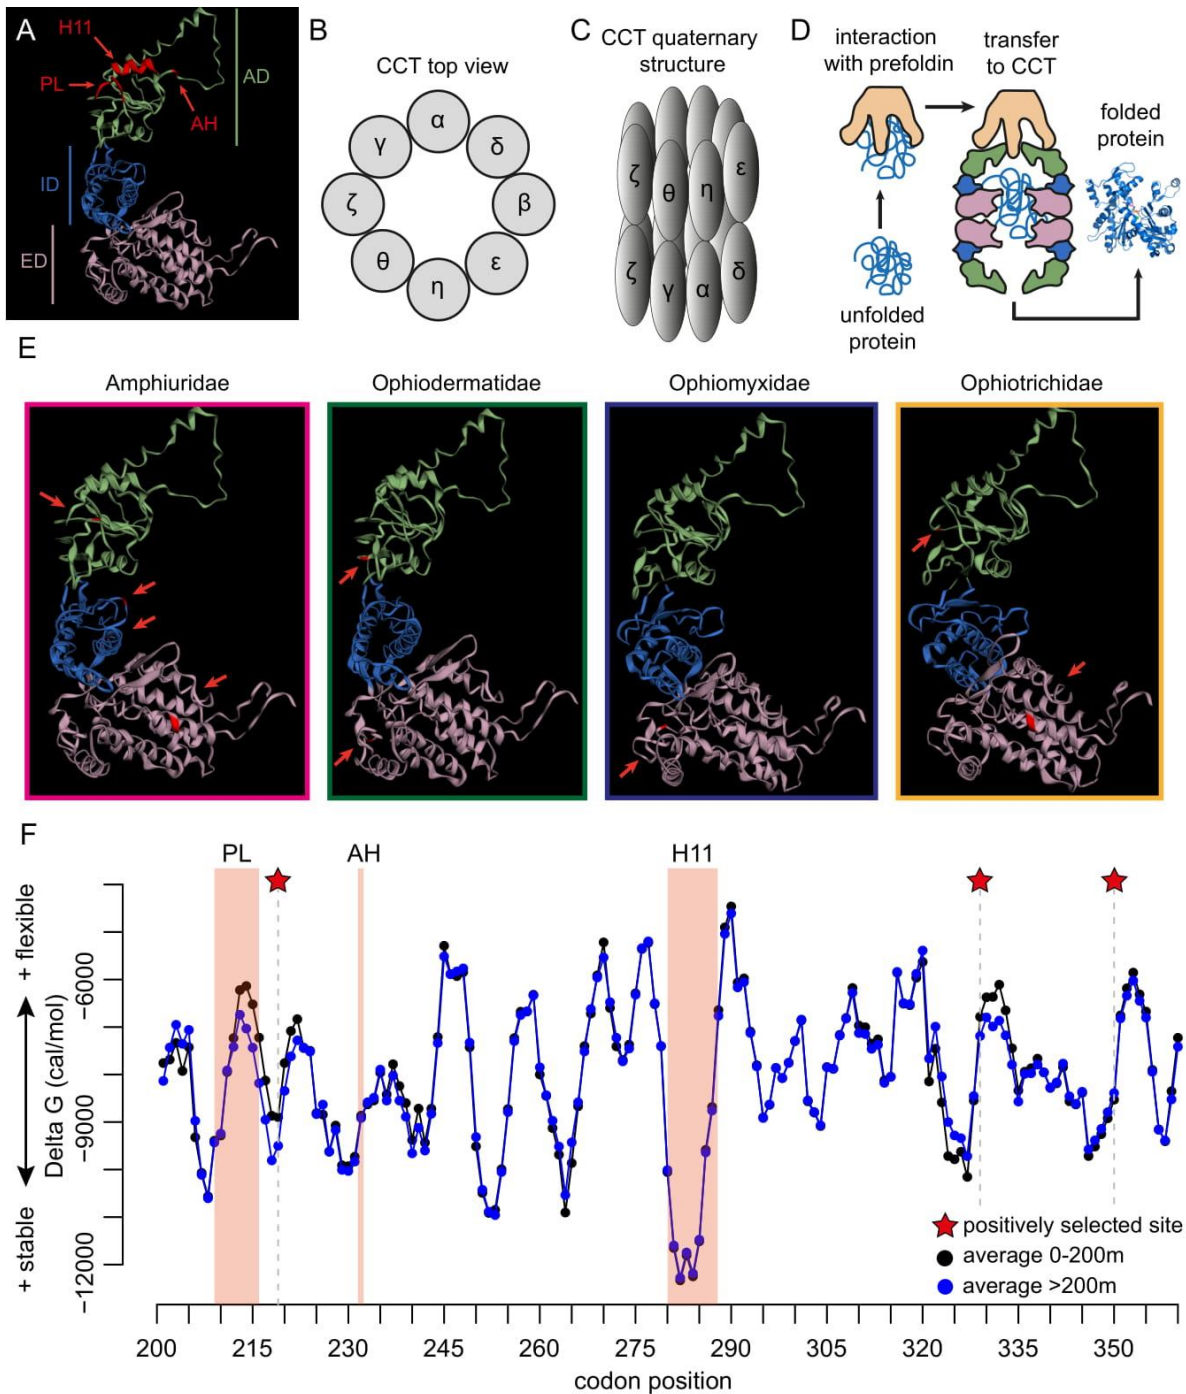

100

101 **Figure 2: Structure and function of the CCT complex, selection analyses on CCT $\alpha$  and comparison**

102 **of stability values from CCT $\alpha$  apical domain between shallow and deep species. A: Model of tertiary**

103 **structure of the CCT $\alpha$  subunit. Each subunit is composed of an apical domain (AD; green) containing the**

104 **substrate binding regions (PL: Proximal Loop; H11: Helix 11; AH: Apical Hinge), an intermediate domain**

105 **(ID; blue) and an equatorial domain (ED; pink) containing the nucleotide binding site and where**

106 **hydrolysis takes place. B: Model of the top view of the CCT complex, encompassing 8 paralogous subunits.**

107 **C: Quaternary structure model of the CCT complex encompassing a double ring of 8 paralogous subunits.**

108 **D: Simplified model of Prefoldin (PFD)-CCT interaction in the folding of newly synthesized actin or**

109 **tubulin. A-D: Adapted from Bueno-Carrasco & Cuellar, 2018, "Mechanism and Function of the Eukaryotic**



110 Chaperonin CCT". E: Localization of the positively selected sites on the tertiary structure of CCT $\alpha$  in the  
111 four ophiuroid families investigated. F: Average protein stability profiles for each codon of the CCT $\alpha$   
112 apical domain in 324 species (424 individuals) from shallow water (0-200m) and 401 species (543  
113 individuals) from deep water (>200m) representative of the whole ophiuroid class. A smaller (i.e. more  
114 negative) value of delta G is indicative of substitutions increasing stability. The substrate binding regions  
115 PL, AH and H11 are highlighted as well as the positively selected sites.

116 CCT $\alpha$ , the sole candidate gene detected as significantly positively selected in three families, is a  
117 subunit of the octameric Chaperonin Containing TCP1 (CCT) complex, a cytosolic eukaryotic  
118 chaperonin having a central role in protein folding (Figure 2A-D)<sup>33,34</sup>. CCT is estimated to fold  
119 ~10% of newly synthesized proteins, including actin and tubulin, and is involved in numerous  
120 core cellular processes such as cytoskeleton formation, cell signaling, cell recognition and  
121 protein degradation. Interestingly, PFD3, a subunit of the hexameric co-chaperone prefoldin  
122 interacting with CCT<sup>35,36</sup> was positively selected in two families (Amphiuridae: MNM, MEME,  
123 BUSTED; Ophiidermatidae: MNM, aBSREL, MEME, BUSTED) (Table 1; Tables S2, S6; Figure 2D),  
124 although it was also positively selected in shallow-water Amphiuridae (Table S3). The two other  
125 prefoldin subunits present in our dataset (PFD1 and PFD5) did not show consistent signature of  
126 positive selection (Table S4), suggesting that sub-units of this co-chaperone can evolve  
127 relatively independently from each other. Finally, two ribosomal proteins (Rpl8 and Rpl34)  
128 were positively selected in two families, suggesting that protein biogenesis (protein synthesis  
129 and folding) may have a central role in deep-sea adaptation.

### 130 *CCT $\alpha$ and deep-sea adaptation: convergence at the gene but not amino-acid level*

131 Although positive selection was detected at the gene level in three families, positive selection at  
132 the site level (MEME) was detected in all four families. Interestingly, the sites displaying  
133 positive selection in CCT $\alpha$  were not the same among the four families (Figure 2E; Table S5).  
134 Four sites were found in the equatorial domain, i.e. the ATP binding region, while three sites  
135 were found in the apical domain, i.e. the substrate binding region<sup>33</sup>. In addition, convergent  
136 evolution at the site level was not detected when examining amino-acid profiles (PCOC  
137 posterior probabilities at all sites < 0.9). Thus, convergent patterns of positive selection were  
138 detected at the pathway and gene levels but convergent evolution was not detected at the  
139 amino-acid level. It has been shown that rates of molecular convergence decrease with time<sup>37</sup>  
140 and the last common ancestor of Amphiuridae, Ophiidermatidae and Ophiomyxidae is  
141 estimated to be approximately 250 million years old<sup>28</sup>. Furthermore, convergence at the amino-  
142 acid level is often the least common compared to convergence at higher levels of biological  
143 hierarchy (e.g. gene, pathway or species levels)<sup>38-40</sup>. While we tested four subunits of the  
144 octameric CCT complex, CCT $\alpha$  was the only one to be detected as showing significant signal of

145 positive selection (Table S6). This might be due to the different degrees of subunit  
146 specialization, as CCT $\alpha$  has intermediate binding properties (i.e. neither high ATP affinity nor  
147 high substrate affinity) compared to the other subunits<sup>33</sup>. Thus, CCT $\alpha$  might be functionally less  
148 constrained to evolve rapidly. Interestingly, it was shown that CCT $\alpha$ , CCT $\gamma$  and CCT $\zeta$  evolved  
149 under positive selection after duplication events which led to sub-functionalization in  
150 eukaryotes, most likely in response to folding increasingly complex cytosolic proteins<sup>41</sup>.

151 *Energetic landscapes reveal structural adaptation within and next to the proximal loop binding*  
152 *region*

153 Next we calculated site-specific protein stability profiles of CCT $\alpha$  in 967 individuals of 725  
154 species representative of the whole Ophiuroidea class, to test the hypothesis that deep-sea  
155 adapted proteins are more stable than their shallow-water counterparts. For each site, we  
156 compared the average stability measure of 324 shallow-water species (0-200m depth) vs. 401  
157 deep-water species (>200m depth), where lower delta G values correspond to higher stability  
158 (Figures 2F, S2A). We focused on the apical domain as it encompasses the substrate binding  
159 region, whose position and structure are highly conserved across eukaryotes<sup>42</sup>. This region is  
160 composed of the proximal loop (PL), the apical hinge (AH) and Helix 11 (H11) (Figure 2A).  
161 While AH and H11 are almost invariant across all ophiuroids, the stability measure was lower  
162 (i.e. more stable) in deep compared to shallow species within the PL and in two sites following  
163 the PL (codons 214-217), close to a positively selected site (codon 219) (Figures 2F, S2A). In  
164 contrast, three codons displayed significantly higher flexibility in deep compared to shallow  
165 species (Figure S2), suggesting that increased flexibility may play a role in deep-sea adaptation  
166 outside the ligand binding region, possibly related to low temperature. Nevertheless, when  
167 averaging delta G values across 10 codons, only the signal close to PL remained significant in the  
168 phylogenetically-corrected ANOVA contrasting stability values of shallow and deep species  
169 (Figure S3). This indicates that substitutions towards a more stable PL occurred independently  
170 in the ophiuroid tree of life. It has previously been reported that the shallow groove created by  
171 the conserved H11 and the flexible PL allows the binding of a variety of substrates<sup>42,43</sup>. Thus, our  
172 results suggest that substitutions in the PL and in adjacent amino acids allow efficient substrate  
173 binding in deep-sea species. Similarly, in a study on metabolic enzymes from 37 ctenophores,  
174 numerous sites associated with adaptation to depth, temperature or both were located close to  
175 the ligand binding region<sup>44</sup>.

## 176 **Discussion**

177 We have shown that over deep evolutionary timescales, CCT $\alpha$ , a sub-unit of the most complex  
178 eukaryotic chaperonin CCT, displays recurrent signatures of accelerated evolution and

179 structural adaptation in transition from shallow to deep-sea habitats across 725 brittle star  
180 species. This was not the case in a study including nine sea urchin species, which found that only  
181 the CCT $\epsilon$  subunit was positively selected, but not in the two deep-sea species investigated<sup>20</sup>.  
182 There are numerous studies on the role of CCT at shorter evolutionary timescales, which  
183 revealed its role in cold-stress response. Notably, CCT has been characterized as a ‘cold-shock’  
184 protein in several eukaryotes due to the overexpression of the investigated subunits when  
185 organisms were exposed to cold stress<sup>45–48</sup>. Furthermore, CCT has been shown to display  
186 specific structural<sup>49</sup> and functional<sup>50</sup> adaptations to cold environment in Antarctic fish, in  
187 addition to being overexpressed in Antarctic fish exposed to heat stress<sup>51</sup>. There is also evidence  
188 for a link between cold-stress response and high-pressure stress response in bacteria<sup>52,53</sup>.  
189 Moreover, cold-inducible protein families are expanded in a hadal amphipod<sup>54</sup>, and several  
190 proteins involved in cold shock have been shown to evolve under positive selection in deep-sea  
191 amphipod and fish<sup>21</sup>. Taken together, our findings support the hypothesis that cold shock  
192 proteins play an important role in deep-sea adaptation<sup>3</sup>.

193 While we acknowledge that our study lacks functional validation to demonstrate that the  
194 changes are truly adaptive (which would be experimentally demanding as CCT folds ~10% of  
195 newly synthesized proteins), we minimized false inferences by applying stringent positive  
196 selection detection criteria. Furthermore, we used a proxy of functional validation by  
197 investigating *in silico* protein stability profiles in a dataset with great comparative power, both  
198 in terms of phylogenetic and environmental diversity. Finally, experimental testing on deep-sea  
199 organisms remains technically challenging, so we made use of the power of molecular data to  
200 reveal new insights in deep-sea adaptation. Further studies should include whole genomes to  
201 obtain a more complete view of deep-sea adaptation mechanisms<sup>55</sup>. Also, while we focused on  
202 intrinsic adaptations, mechanisms of extrinsic adaptations through osmolyte concentration  
203 should not be overlooked<sup>56</sup>, but they were beyond the scope of this study. With increasing  
204 interests in deep-sea biodiversity, ecosystems and resources in the last decades<sup>57–59</sup>, these are  
205 exciting times for diving deeper into mechanisms of deep-sea adaptation.

## 206 **Methods**

### 207 *Phylogenomic data generation and processing*

208 The data used in this study is an extension (436 additional samples) of a previously published  
209 exon-capture phylogenomic datamatrix of 1484 exons in 416 genes for 708 individual ophiuroid  
210 samples representative of the whole class Ophiuroidea<sup>30</sup>. The full dataset used here  
211 encompassed 1144 individual ophiuroid samples accounting for 826 species. Details on  
212 specimen collection, environmental parameters and list of species are available in Table S1. The



213 set of 416 single-copy genes were first determined in a transcriptome analysis<sup>29</sup> and the  
214 subsequent exon-capture system laboratory, bioinformatic and phylogenetic procedures are  
215 described in<sup>28,60</sup> and dryad packages <https://doi.org/10.5061/dryad.db339/10> and  
216 <https://datadryad.org/stash/dataset/doi:10.5061/dryad.rb334>. Briefly, base-calling used a  
217 minimum read coverage of five. Exon boundaries were initially based on the *Strongylocentrotus*  
218 *purpuratus* and *Danio rerio* genomes, and then revised using the exon-capture read mapping  
219 information. For all selection analyses, codons immediately adjacent to exon boundaries were  
220 ignored. The primary data had IUPAC-coded heterozygous sites, which were then randomly  
221 resolved. However, these sites had little influence as both ambiguity-coded and randomly  
222 resolved datasets returned the same positive selection test results. A global phylogenetic tree of  
223 all 1144 samples for 416 genes (273kb sites) was generated via RAxML v.8. (Stamatakis 2014)  
224 using a codon position partition model. First a fully resolved all compatible consensus topology  
225 was generated from 200 RAxML fast bootstrap samples (the -f -d command), onto which branch  
226 lengths were then optimized using a codon position GTR- $\Gamma$  model (the -f -e command). The tree  
227 was then rooted according to<sup>28</sup> defining the sister superorders Ophintegrida and Euryophiurida.

228 Four brittle star families were investigated that included species displaying independent events  
229 of deep-sea colonization from shallow-water<sup>32</sup>: Amphiuridae (111 individuals from 95 species,  
230 depth range: -0.5m to -5193m; temperature range: -1.6°C to 28.8°C), Ophiodermatidae (60  
231 individuals from 38 species, depth range: -0.5m to -1668m; temperature range: 2.6°C to 28.3°C),  
232 Ophiomyxidae (41 individuals from 29 species, depth range: -1.5m to -792m; temperature  
233 range: 4.6°C to 28.7°C) and Ophiotrichidae (78 individuals from 62 species, depth range: -1m to  
234 -405m; temperature range: 10.5°C to 29.5°C). Positive selection analyses were conducted  
235 separately per family. 1664 alignments were generated, representing each gene (416) in each  
236 family (4). In each alignment, a maximum of 30% missing data per sequence was allowed.  
237 Alignments that lacked deep species (>200m) after filtering were not used. As all these four  
238 families belong to the superorder Ophintegrida, sequences of *Asteronyx loveni* belonging to the  
239 sister superorder Euryophiurida (Asteronychidae) were used as outgroups. After filtering,  
240 1649 alignments were available for further analyses.

#### 241 *Phylogenetic reconstruction and positive selection analyses*

242 For each of the 1649 alignments, a Maximum-Likelihood phylogeny was reconstructed using  
243 RAxML v.8.2.11 with the following parameters: -x 12345 -# 100 -f a -m GTRGAMMA -p 12345  
244 (Figure 1B). Deep (>200m) species (tips) and monophyletic groups of deep species (nodes)  
245 were labeled as “Foreground” branches for positive selection analyses (Amphiuridae: 46  
246 species; 11 independent events of deep-sea colonization; Ophiodermatidae: 7 species; 4  
247 independent events; Ophiomyxidae: 10 species; 4 independent events; Ophiotrichidae: 4

248 species; 4 independent events). Then, the package HyPhy was used to conduct several positive  
249 selection analyses (Figure 1C): 1) BUSTED (Branch-site Unrestricted Statistical Test for Episodic  
250 Diversification) <sup>61</sup> to test for gene-wide positive selection (at least one site on at least one  
251 branch); 2) aBSREL (adaptive Branch-Site Random Effects Likelihood) <sup>62</sup> to detect specific  
252 branches evolving under episodic positive selection; 3) MEME (Mixed Effects Model of  
253 Evolution) <sup>63</sup> to find sites evolving under episodic positive selection. 4) MNM method; it has  
254 been shown recently that mutations at adjacent sites often occur as a result of the same  
255 mutational event (i.e. multinucleotide mutations, MNMs) and therefore may bias classical  
256 branch-site tests for positive selection <sup>64</sup>. The authors of that study developed a new model of  
257 positive selection detection incorporating MNMs, which we also used to detect positive  
258 selection on deep lineages (>200m). For each gene, p-values were corrected for multiple testing  
259 using the Holm method <sup>65</sup>. The p-value significance level used for all the positive selection  
260 detection methods was 0.05. Finally, we used: 5) RELAX <sup>66</sup> to test for relaxation of selection, and  
261 exclude potential candidate genes displaying relaxation of selection. For each of the four  
262 families, positively selected candidate genes of each method were overlapped on a Venn  
263 diagram (Figures 1C and S1). To be considered as a candidate gene for positive selection in one  
264 family and to minimize the risk of false positives, a gene had to display a significant signal in at  
265 least three out of four methods including MEME and MNM (BUSTED, MEME, MNM or MEME,  
266 MNM, aBSREL) and not display relaxation of selection (RELAX). This set of candidates was used  
267 for functional annotation. Final sets of positively selected genes per family were then compared  
268 among each other to test for convergent evolution. To confirm that positive selection was  
269 detected only in deep-sea lineages, positive selection was also tested in shallow-water lineages  
270 for the five genes displaying convergent positive selection signatures (CCT $\alpha$ , PFD3, tkt, rpl34,  
271 rpl8; see Results, Table 1). For each family, the same number of shallow-water species as was  
272 used for deep-water species was randomly labeled as 'Foreground' in each gene tree and  
273 positive selection tests were performed for the five methods as described above.

#### 274 *Gene Ontology annotations and amino-acid convergence analyses*

275 To explore which functions may be involved in deep-sea adaptation, the representative  
276 sequence of each of the 416 genes was extracted from the sea urchin *Strongylocentrotus*  
277 *purpuratus* genome and blasted against the nr database from NCBI using BLAST+. We used *S.*  
278 *purpuratus* as reference because sequence annotation for this species is of high quality (no high-  
279 quality brittle star reference genome is currently available) and to use a single complete  
280 representative sequence for each gene. The top 50 hits were extracted and loaded in BLAST2GO  
281 v.4.1. for annotation <sup>67</sup>. Mapping, annotation and slim ontology (i.e. GO subsets of broader  
282 categories) were performed with BLAST2GO using default parameters, except for the

283 annotation cut-off parameter that was set to 45. GO categories were described using the level 3  
284 of slim ontology.

285 CCT $\alpha$ , the only candidate gene displaying positive selection signal in three families (see Results)  
286 was further analyzed for signatures of convergent evolution. Specifically, amino-acid profiles  
287 were investigated for convergent shifts using PCOC<sup>68</sup>. This method, which has been shown to  
288 display high sensitivity and specificity, detects convergent shifts in amino-acid preferences  
289 rather than convergent substitutions. The CCT $\alpha$  amino-acid alignment encompassing the four  
290 families and outgroups was used to generate a maximum-likelihood phylogeny as previously  
291 described but this time using the PROTGAMMAWAG protein model of sequence evolution  
292 (Figure S4). For each family, positively selected branches resulting from aBSREL analyses were  
293 labeled as foreground branches (i.e. the branches with the convergent phenotype in the  
294 nucleotide topology) in four different scenarios: i) Amphiuroidae, Ophiidermatidae,  
295 Ophiomyxidae; ii) Amphiuroidae, Ophiidermatidae; iii) Amphiuroidae, Ophiomyxidae; iv)  
296 Ophiidermatidae, Ophiomyxidae. Detection of amino-acid convergence in these four scenarios  
297 was then performed using PCOC and a detection threshold of 0.9 <sup>68</sup>.

#### 298 *Protein structure modeling and protein stability profile*

299 To infer the position of positively selected mutations on CCT $\alpha$ , the corresponding amino-acid  
300 sequence of the individual *Amphiura constricta*\_MVF214041 was used to obtain the secondary  
301 and tertiary protein structures of this gene. This species was chosen because its CCT $\alpha$  sequence  
302 had no missing data. The secondary structure was modeled using InterPro 72.0 web browser  
303 (<https://www.ebi.ac.uk/interpro/>). The protein model was generated using the normal mode of  
304 the online Phyre<sup>2</sup> server <sup>69</sup>. The online server EzMol 1.22 was used for image visualization and  
305 production <sup>70</sup>.

306 We then examined the protein stability profiles of CCT $\alpha$  across the whole ophiuroid class (967  
307 sequences with less than 30% missing sites, representing 725 species) using eScape v2.1 <sup>71,72</sup>.  
308 This algorithm calculates a per-site estimate of Gibbs free energy of stabilization based on a  
309 sliding window of 20 residues. More specifically, it models the contribution of each residue to  
310 the stability constant, a metric that represents the equilibrium of the natively folded and the  
311 multiple unfolded states of a protein <sup>73</sup>. Sites adapted to elevated pressure (or high temperature  
312 at atmospheric pressure) are expected to display stabilizing mutations (i.e. more negative delta  
313 G values), whereas sites adapted to low temperatures at atmospheric pressure are expected to  
314 display mutations increasing flexibility (i.e. decreasing stability, thus more positive delta G  
315 values) <sup>18,19</sup>. For each site of the apical domain (codons 200-361), we calculated the average  
316 delta G value for all 324 shallow-water species (424 individuals) (0-200m) and 401 deep-water

317 species (543 individuals) (>200m). To test the difference between these average values in a  
318 phylogenetic context, we used phylogenetically-corrected ANOVA (R function `phylANOVA` of the  
319 `phytools` v.0.6-60 R package; 10,000 simulations). To correct for relatedness among species, we  
320 used the global RAxML phylogenetic tree pruned to the 967 tips. To investigate regions rather  
321 than individual codons, we contrasted shallow vs. deep species along the whole gene, averaging  
322 delta G values across 10 residues and performing a phylogenetically-corrected ANOVA as  
323 previously described.

## 324 References

- 325 1. Ramirez-Llodra, E. Z. *et al.* Deep, diverse and definitely different: unique attributes of the world's  
326 largest ecosystem. *Biogeosciences* **7**, 2851–2899 (2010).
- 327 2. Gross, M. & Jaenicke, R. Proteins under pressure: the influence of high hydrostatic pressure on  
328 structure, function and assembly of proteins and protein complexes. *Eur. J. Biochem.* **221**, 617–630  
329 (1994).
- 330 3. Brown, A. & Thatje, S. Explaining bathymetric diversity patterns in marine benthic invertebrates and  
331 demersal fishes: physiological contributions to adaptation of life at depth. *Biol. Rev.* **89**, 406–426  
332 (2014).
- 333 4. Somero, G. N. Adaptations to high hydrostatic pressure. *Annu. Rev. Physiol.* **54**, 557–577 (1992).
- 334 5. Carney, R. S. Zonation of deep biota on continental margins. in *Oceanography and Marine Biology*  
335 221–288 (CRC Press, 2005).
- 336 6. Jaenicke, R. Protein stability and molecular adaptation to extreme conditions. in *EJB Reviews 1991*  
337 291–304 (Springer, 1991).
- 338 7. Pradillon, F. & Gaill, F. Adaptation to deep-sea hydrothermal vents: some molecular and  
339 developmental aspects. *J. Mar. Sci. Technol.* 37–53 (2007).
- 340 8. Siebenaller, J. F. Effects of the deep-sea environment on invertebrates. *Comp. High Press. Biol.* 319–  
341 341 (2010).
- 342 9. Somero, G. N. Life at low volume change: hydrostatic pressure as a selective factor in the aquatic  
343 environment. *Am. Zool.* **30**, 123–135 (1990).
- 344 10. DAHLHOFF, E. & SOMERO, G. N. Pressure and temperature adaptation of cytosolic malate  
345 dehydrogenases of shallow and deep-living marine invertebrates: evidence for high body  
346 temperatures in hydrothermal vent animals. *J. Exp. Biol.* **159**, 473–487 (1991).
- 347 11. Lemaire, B. *et al.* Molecular adaptation to high pressure in cytochrome P450 1A and aryl hydrocarbon  
348 receptor systems of the deep-sea fish *Coryphaenoides armatus*. *Biochim. Biophys. Acta BBA-Proteins*  
349 *Proteomics* **1866**, 155–165 (2018).
- 350 12. Morita, T. Comparative sequence analysis of myosin heavy chain proteins from congeneric shallow-  
351 and deep-living rattail fish (genus *Coryphaenoides*). *J. Exp. Biol.* **211**, 1362–1367 (2008).
- 352 13. Morita, T. Structure-based analysis of high pressure adaptation of  $\alpha$ -actin. *J. Biol. Chem.* **278**, 28060–  
353 28066 (2003).
- 354 14. Siebenaller, J. F. & Somero, G. N. Pressure-adaptive differences in the binding and catalytic properties  
355 of muscle-type (M 4) lactate dehydrogenases of shallow and deep-living marine fishes. *J. Comp.*  
356 *Physiol.* **129**, 295–300 (1979).
- 357 15. Siebenaller, J. & Somero, G. N. Pressure-adaptive differences in lactate dehydrogenases of congeneric  
358 fishes living at different depths. *Science* **201**, 255–257 (1978).
- 359 16. Suka, A. *et al.* Stability of cytochromes *c'* from psychrophilic and piezophilic *Shewanella* species:  
360 implications for complex multiple adaptation to low temperature and high hydrostatic pressure.  
361 *Extremophiles* **23**, 239–248 (2019).
- 362 17. Wakai, N., Takemura, K., Morita, T. & Kitao, A. Mechanism of deep-sea fish  $\alpha$ -actin pressure tolerance  
363 investigated by molecular dynamics simulations. *PLoS One* **9**, e85852 (2014).
- 364 18. Fields, P. A., Dong, Y., Meng, X. & Somero, G. N. Adaptations of protein structure and function to  
365 temperature: there is more than one way to 'skin a cat'. *J. Exp. Biol.* **218**, 1801–1811 (2015).
- 366 19. Saarman, N. P., Kober, K. M., Simison, W. B. & Pogson, G. H. Sequence-based analysis of thermal  
367 adaptation and protein energy landscapes in an invasive blue mussel (*Mytilus galloprovincialis*).  
368 *Genome Biol. Evol.* **9**, 2739–2751 (2017).

- 369 20. Kober, K. M. & Pogson, G. H. Genome-wide signals of positive selection in stronglycentrotid sea  
370 urchins. *BMC Genomics* **18**, 555 (2017).
- 371 21. Lan, Y. *et al.* De novo transcriptome assembly and positive selection analysis of an individual deep-  
372 sea fish. *BMC Genomics* **19**, 394 (2018).
- 373 22. Oliver, T. A. *et al.* Whole-genome positive selection and habitat-driven evolution in a shallow and a  
374 deep-sea urchin. *Genome Biol. Evol.* **2**, 800–814 (2010).
- 375 23. Sun, J. *et al.* Adaptation to deep-sea chemosynthetic environments as revealed by mussel genomes.  
376 *Nat. Ecol. Evol.* **1**, 0121 (2017).
- 377 24. Zhang, Y. *et al.* Adaptation and evolution of deep-sea scale worms (Annelida: Polynoidae): insights  
378 from transcriptome comparison with a shallow-water species. *Sci. Rep.* **7**, 46205 (2017).
- 379 25. Weber, A. A.-T. *et al.* Positive selection on sperm ion channels in a brooding brittle star: consequence  
380 of life-history traits evolution. *Mol. Ecol.* **26**, 3744–3759 (2017).
- 381 26. Stöhr, S., O’Hara, T. D. & Thuy, B. World Ophiuroidea Database. (2017).
- 382 27. Stöhr, S., O’Hara, T. D. & Thuy, B. Global diversity of brittle stars (Echinodermata: Ophiuroidea). *PLoS*  
383 *ONE* **7**, e31940 (2012).
- 384 28. O’Hara, T. D., Hugall, A. F., Thuy, B., Stöhr, S. & Martynov, A. V. Restructuring higher taxonomy using  
385 broad-scale phylogenomics: The living Ophiuroidea. *Mol. Phylogenet. Evol.* **107**, 415–430 (2017).
- 386 29. O’Hara, T. D., Hugall, A. F., Thuy, B. & Moussalli, A. Phylogenomic resolution of the class Ophiuroidea  
387 unlocks a global microfossil record. *Curr. Biol.* **24**, 1874–1879 (2014).
- 388 30. O’Hara, T. D., Hugall, A. F., Woolley, S. N., Bribiesca-Contreras, G. & Bax, N. J. Contrasting processes  
389 drive ophiuroid phylogeny across shallow and deep seafloors. *Nature* **565**, 636 (2019).
- 390 31. Woolley, S. N. *et al.* Deep-sea diversity patterns are shaped by energy availability. *Nature* **533**, 393–  
391 410 (2016).
- 392 32. Bribiesca-Contreras, G., Verbruggen, H., Hugall, A. F. & O’Hara, T. D. The importance of offshore  
393 origination revealed through ophiuroid phylogenomics. in *Proc. R. Soc. B* vol. 284 20170160 (The  
394 Royal Society, 2017).
- 395 33. Bueno-Carrasco, M. T. & Cuéllar, J. Mechanism and Function of the Eukaryotic Chaperonin CCT. *ELS*  
396 *John Wiley Sons Ltd Ed* 1–9 (2019) doi:10.1002/9780470015902.a0028208.
- 397 34. Valpuesta, J. M., Carrascosa, J. L. & Willison, K. R. Structure and function of the cytosolic chaperonin  
398 CCT. *Protein Fold. Handb.* 725–755 (2005).
- 399 35. Gestaut, D. *et al.* The Chaperonin TRiC/CCT Associates with Prefoldin through a Conserved  
400 Electrostatic Interface Essential for Cellular Proteostasis. *Cell* **177**, 751–765 (2019).
- 401 36. Martín-Benito, J. *et al.* Structure of eukaryotic prefoldin and of its complexes with unfolded actin and  
402 the cytosolic chaperonin CCT. *EMBO J.* **21**, 6377–6386 (2002).
- 403 37. Storz, J. F. Causes of molecular convergence and parallelism in protein evolution. *Nat. Rev. Genet.* **17**,  
404 239–250 (2016).
- 405 38. Bolnick, D. I., Barrett, R. D., Oke, K. B., Rennison, D. J. & Stuart, Y. E. (Non) parallel evolution. *Annu. Rev.*  
406 *Ecol. Evol. Syst.* **49**, 303–330 (2018).
- 407 39. Tenaillon, O. *et al.* Tempo and mode of genome evolution in a 50,000-generation experiment. *Nature*  
408 **536**, 165 (2016).
- 409 40. Tenaillon, O. *et al.* The molecular diversity of adaptive convergence. *Science* **335**, 457–461 (2012).
- 410 41. Fares, M. A. & Wolfe, K. H. Positive selection and subfunctionalization of duplicated CCT chaperonin  
411 subunits. *Mol. Biol. Evol.* **20**, 1588–1597 (2003).
- 412 42. Joachimiak, L. A., Walzthoeni, T., Liu, C. W., Aebersold, R. & Frydman, J. The structural basis of  
413 substrate recognition by the eukaryotic chaperonin TRiC/CCT. *Cell* **159**, 1042–1055 (2014).
- 414 43. Yam, A. Y. *et al.* Defining the TRiC/CCT interactome links chaperonin function to stabilization of  
415 newly made proteins with complex topologies. *Nat. Struct. Mol. Biol.* **15**, 1255 (2008).
- 416 44. Winnikoff, J. R., Francis, W. R., Thuesen, E. V. & Haddock, S. H. D. Combing transcriptomes for secrets  
417 of deep-sea survival: Environmental diversity drives patterns of protein evolution. *Integr. Comp. Biol.*  
418 (2019).
- 419 45. He, Y., Wang, L., Zhu, W., Dong, Z. & Liu, N. Effects of salinity on cold tolerance of Malaysian red tilapia.  
420 *Aquac. Int.* **25**, 777–792 (2017).
- 421 46. Kayukawa, T. *et al.* Expression of mRNA for the t; chcomplex polypeptide-1, a subunit of chaperonin  
422 CCT, is upregulated in association with increased cold hardiness in *Delia antiqua*. *Cell Stress*  
423 *Chaperones* **10**, 204 (2005).
- 424 47. Somer, L., Shmulman, O., Dror, T., Hashmueli, S. & Kashi, Y. The eukaryote chaperonin CCT is a cold  
425 shock protein in *Saccharomyces cerevisiae*. *Cell Stress Chaperones* **7**, 47 (2002).
- 426 48. Yin, Q. *et al.* Molecular cloning of *Litopenaeus vannamei* TCP-1-eta gene and analysis on its  
427 relationship with cold tolerance. *Yi Chuan Hered.* **33**, 168–174 (2011).



- 428 49. Pucciarelli, S., Parker, S. K., Detrich, H. W. & Melki, R. Characterization of the cytoplasmic chaperonin  
429 containing TCP-1 from the Antarctic fish *Notothenia coriiceps*. *Extremophiles* **10**, 537–549 (2006).
- 430 50. Cuellar, J. *et al.* Assisted protein folding at low temperature: evolutionary adaptation of the Antarctic  
431 fish chaperonin CCT and its client proteins. *Biol. Open* **3**, 261–270 (2014).
- 432 51. Buckley, B. A. & Somero, G. N. cDNA microarray analysis reveals the capacity of the cold-adapted  
433 Antarctic fish *Trematomus bernacchii* to alter gene expression in response to heat stress. *Polar Biol.*  
434 **32**, 403–415 (2009).
- 435 52. Welch, T. J., Farewell, A., Neidhardt, F. C. & Bartlett, D. H. Stress response of *Escherichia coli* to  
436 elevated hydrostatic pressure. *J. Bacteriol.* **175**, 7170–7177 (1993).
- 437 53. Wemekamp-Kamphuis, H. H., Karatzas, A. K., Wouters, J. A. & Abee, T. Enhanced levels of cold shock  
438 proteins in *Listeria monocytogenes* L028 upon exposure to low temperature and high hydrostatic  
439 pressure. *Appl. Environ. Microbiol.* **68**, 456–463 (2002).
- 440 54. Lan, Y. *et al.* Molecular adaptation in the world's deepest-living animal: Insights from transcriptome  
441 sequencing of the hadal amphipod *Hirondellea gigas*. *Mol. Ecol.* **26**, 3732–3743 (2017).
- 442 55. Gaither, M. R. *et al.* Genomics of habitat choice and adaptive evolution in a deep-sea fish. *Nat. Ecol.*  
443 *Evol.* **2**, 680 (2018).
- 444 56. Yancey, P. H. & Siebenaller, J. F. Co-evolution of proteins and solutions: protein adaptation versus  
445 cytoprotective micromolecules and their roles in marine organisms. *J. Exp. Biol.* **218**, 1880–1896  
446 (2015).
- 447 57. Danovaro, R., Corinaldesi, C., Dell'Anno, A. & Snelgrove, P. V. The deep-sea under global change. *Curr.*  
448 *Biol.* **27**, R461–R465 (2017).
- 449 58. Danovaro, R., Snelgrove, P. V. & Tyler, P. Challenging the paradigms of deep-sea ecology. *Trends Ecol.*  
450 *Evol.* **29**, 465–475 (2014).
- 451 59. Glover, A. G., Wiklund, H., Chen, C. & Dahlgren, T. G. Point of View: Managing a sustainable deep-sea  
452 'blue economy' requires knowledge of what actually lives there. *eLife* **7**, e41319 (2018).
- 453 60. Hugall, A. F., O'Hara, T. D., Hunjan, S., Nilsen, R. & Moussalli, A. An exon-capture system for the entire  
454 class Ophiuroidea. *Mol. Biol. Evol.* **33**, 281–294 (2015).
- 455 61. Murrell, B. *et al.* Gene-wide identification of episodic selection. *Mol. Biol. Evol.* **32**, 1365–1371 (2015).
- 456 62. Smith, M. D. *et al.* Less is more: an adaptive branch-site random effects model for efficient detection  
457 of episodic diversifying selection. *Mol. Biol. Evol.* **32**, 1342–1353 (2015).
- 458 63. Murrell, B. *et al.* Detecting individual sites subject to episodic diversifying selection. *PLoS Genet.* **8**,  
459 e1002764 (2012).
- 460 64. Venkat, A., Hahn, M. W. & Thornton, J. W. Multinucleotide mutations cause false inferences of lineage-  
461 specific positive selection. *Nat. Ecol. Evol.* **2**, 1280 (2018).
- 462 65. Holm, S. A simple sequentially rejective multiple test procedure. *Scand. J. Stat.* 65–70 (1979).
- 463 66. Wertheim, J. O., Murrell, B., Smith, M. D., Kosakovsky Pond, S. L. & Scheffler, K. RELAX: detecting  
464 relaxed selection in a phylogenetic framework. *Mol. Biol. Evol.* **32**, 820–832 (2014).
- 465 67. Conesa, A. *et al.* Blast2GO: a universal tool for annotation, visualization and analysis in functional  
466 genomics research. *Bioinformatics* **21**, 3674–3676 (2005).
- 467 68. Rey, C., Guéguen, L., Sémon, M. & Boussau, B. Accurate detection of convergent amino-acid evolution  
468 with PCOC. *Mol. Biol. Evol.* **35**, 2296–2306 (2018).
- 469 69. Kelley, L. A., Mezulis, S., Yates, C. M., Wass, M. N. & Sternberg, M. J. The Phyre2 web portal for protein  
470 modeling, prediction and analysis. *Nat. Protoc.* **10**, 845 (2015).
- 471 70. Reynolds, C. R., Islam, S. A. & Sternberg, M. J. EzMol: A web server wizard for the rapid visualization  
472 and image production of protein and nucleic acid structures. *J. Mol. Biol.* **430**, 2244–2248 (2018).
- 473 71. Gu, J. & Hilser, V. J. Sequence-based analysis of protein energy landscapes reveals nonuniform  
474 thermal adaptation within the proteome. *Mol. Biol. Evol.* **26**, 2217–2227 (2009).
- 475 72. Gu, J. & Hilser, V. J. Predicting the energetics of conformational fluctuations in proteins from  
476 sequence: a strategy for profiling the proteome. *Structure* **16**, 1627–1637 (2008).
- 477 73. D'Aquino, J. A. *et al.* The magnitude of the backbone conformational entropy change in protein  
478 folding. *Proteins Struct. Funct. Bioinforma.* **25**, 143–156 (1996).
- 479

## 480 Acknowledgements

481 We are grateful to W. Salzburger for providing access to the HPC sciCORE cluster and to J.  
482 Sarrazin for comments on a previous version of the manuscript. Calculations were performed at  
483 sciCORE (<http://scicore.unibas.ch/>) scientific computing center at the University of Basel,

484 Switzerland and at DATARMOR (<http://www.ifremer.fr/pcdm>) scientific computing center at  
485 the Pôle de Calcul et de Données Marines (PCDM), Ifremer, Brest, France. AATW was supported  
486 by an Endeavour Postdoctoral Fellowship awarded by the Australian Department of Education  
487 and Training (Grant Agreement No 6534\_2018) and a Marie Skłodowska-Curie Global  
488 Fellowship awarded by the European Union's Horizon 2020 research and innovation  
489 programme (Grant Agreement No 797326; Project DEEPADAPT).

#### 490 **Author contributions**

491 TOH collected the samples. TOH and AFH designed and generated the exon-capture data. AFH  
492 processed the raw data to generate the phylogenomic dataset. AATW designed the present  
493 study, performed positive selection, convergence and stability analyses. AATW drafted the  
494 manuscript and it was finalized with input from all co-authors.

#### 495 **Competing interests**

496 None declared

#### 497 **Data availability**

498 Phylogenomic data (including raw reads) and scripts for dataset generation are available in  
499 NCBI Bioproject PRJNA311384 and dryad packages: <https://doi.org/10.5061/dryad.db339/10>  
500 and <https://datadryad.org/stash/dataset/doi:10.5061/dryad.rb334>. There are no restrictions  
501 on data availability.

#### 502 **Code availability**

503 All custom computer codes are available upon request. There are no restrictions on their use.

#### 504 **Supplementary figure captions**

505 **Figure S1: Overlap of positively selected candidate genes among three brittle star families.** A:  
506 Number of candidate genes per family positively selected in at least three positive selection detection  
507 methods and not displaying relaxation of selection. B: Number of candidate genes per family positively  
508 selected in all four positive selection detection methods and not displaying relaxation of selection. In both  
509 conditions of A and B, no gene was positively selected in the family Ophiotrichidae.

510 **Figure S2: Comparison of stability values from CCT $\alpha$  apical domain between shallow and deep**  
511 **species.** A: Log transformed p-values of the phylogenetically-corrected ANOVA performed between  
512 average delta G values of shallow vs. deep species at each codon of the CCT $\alpha$  apical domain. The substrate  
513 binding regions PL, AH and H11 are highlighted in light orange. The positively selected sites are  
514 highlighted with a red star. P-value level corresponding to 0.05 is highlighted in red. The most significant  
515 codons in a "significance peak" (204, 214, 265 and 324) are highlighted. B: Beanplots of delta G values

516 between shallow (0-200m) and deep (>200m) species for each one of the most significant codons in the  
517 phylogenetically-corrected ANOVA. Horizontal bar represents the average value of the dataset.

518 **Figure S3: Comparison of stability values over 10 codon windows on the complete CCT $\alpha$  gene**  
519 **between shallow and deep species.** A: Average protein stability profiles over 10 codon windows for the  
520 complete CCT $\alpha$  gene in 324 species (424 individuals) from shallow water (0-200m) and 401 species (543  
521 individuals) from deep water (>200m) representative of the whole ophiuroid class. A smaller (i.e. more  
522 negative) value of delta G is indicative of substitutions increasing stability. The substrate binding regions  
523 PL, AH and H11 are highlighted as well as the positively selected sites. B: Log transformed p-values of the  
524 phylogenetically-corrected ANOVA performed between average delta G values over 10 codon windows of  
525 shallow vs. deep species. The positively selected sites are highlighted with a red star. P-value level  
526 corresponding to 0.05 is highlighted in red. C: Beanplots of delta G values between shallow (0-200m) and  
527 deep (>200m) species for both of the most significant 10 codon windows in the phylogenetically-  
528 corrected ANOVA. Horizontal bar represents the average value of the dataset.

529 **Figure S4: Maximum-likelihood reconstruction of CCT $\alpha$  using amino-acid sequences.** The four focal  
530 families (Amphiuridae, Ophiotrichae, Ophiomyxidae and Ophiodermatidae) and the outgroup  
531 (Asteronychidae) are labelled. Positively selected lineages (aBSREL method) of each family are  
532 highlighted in red.

### 533 **Supplementary tables (in separate excel file)**

534 **Table S1:** List of species used in this study, GPS coordinates and environmental parameters at their  
535 sampling locations. Empty cells indicate missing data.

536 **Table S2:** Positively selected candidate genes per family and their Gene Ontology annotation (P:  
537 Biological Process; F: Molecular Function; C: Cellular Component). Genes positively selected in several  
538 families are highlighted in bold.

539 **Table S3:** Results of positive selection tests in shallow-water lineages for the five candidate genes for  
540 deep-sea adaptation. Significance level: 0.05. Significant results are in bold. NS: not significant

541 **Table S4:** Results of positive selection tests for the three prefoldin subunits for each family. Significance  
542 level: 0.05. Significant results are in bold. NS: not significant

543 **Table S5:** Sites displaying episodic positive selection in CCT $\alpha$ . Method used: MEME. Significance level:  
544 0.05. Significant sites are in bold.

545 **Table S6:** Results of positive selection tests for the four CCT subunits for each family. Significant results  
546 are in bold. Significance level: 0.05. NS: not significant
